# Supplementary material for: Human nuclear RNAi-defective 2 (NRDE2) is an essential RNA splicing factor
Source: PubMed Central journal article supplement — RNA. 2019 Mar;25(3):352–63. doi: 10.1261/rna.069773.118 (PMC6380277; doi:10.1261/rna.069773.118), 2019-03

Supplemental Fig. 1

A

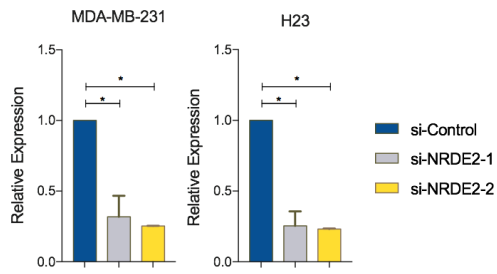

C

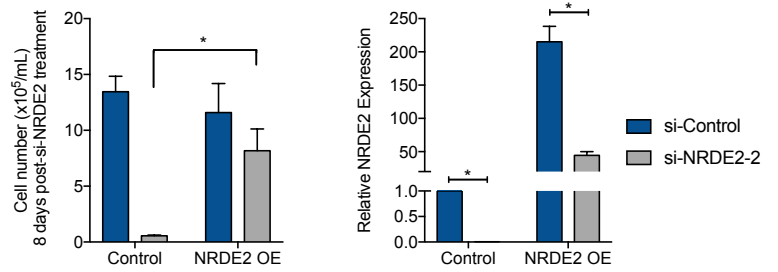

B

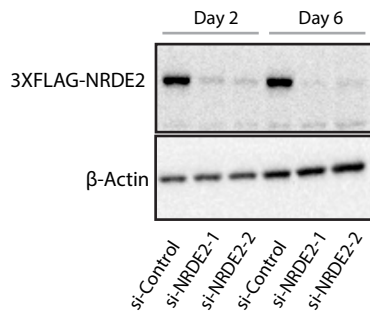

D

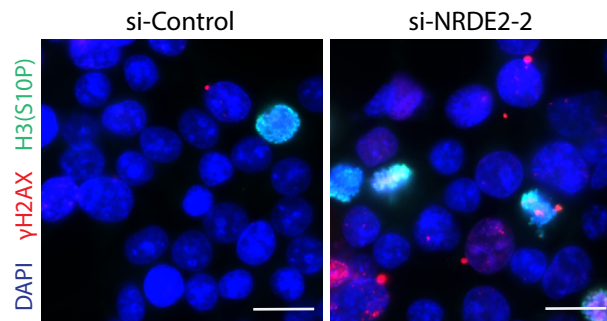

E

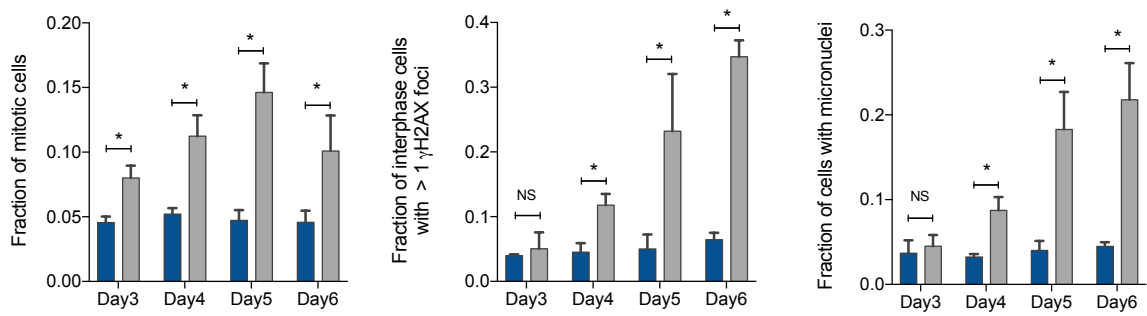

F

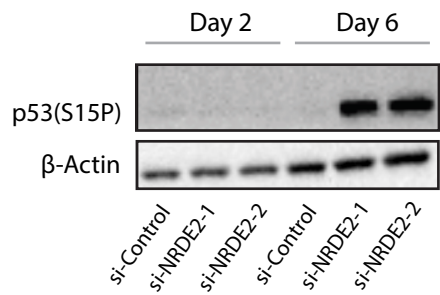

# Supplemental Fig. 2

A

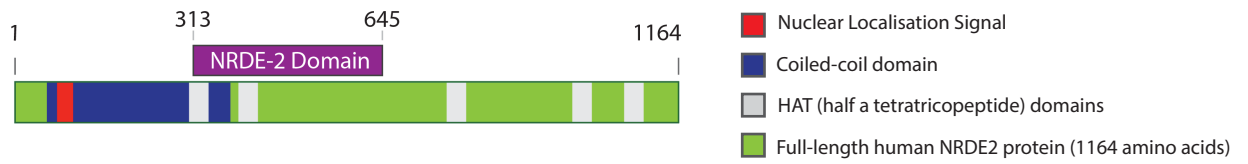

B

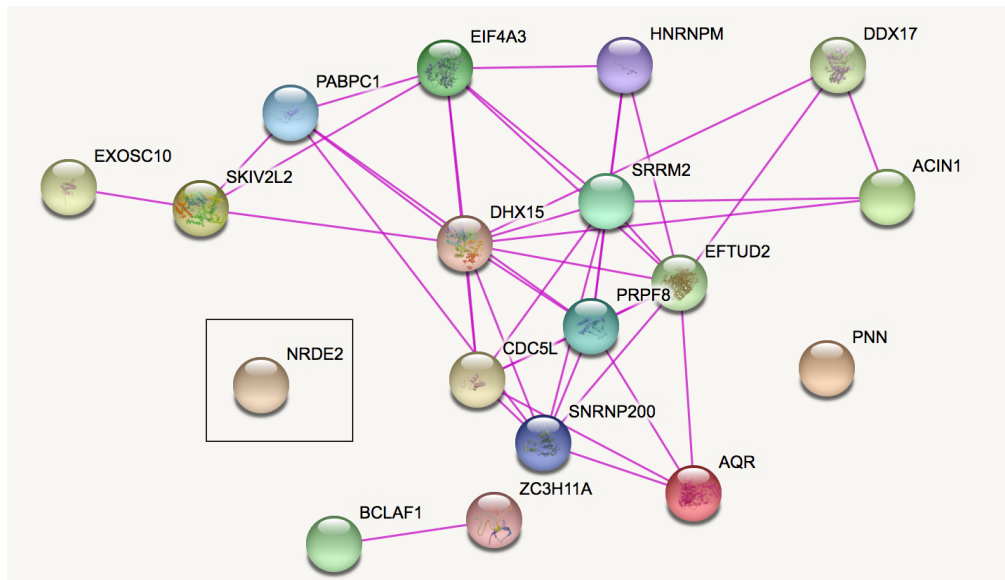

C

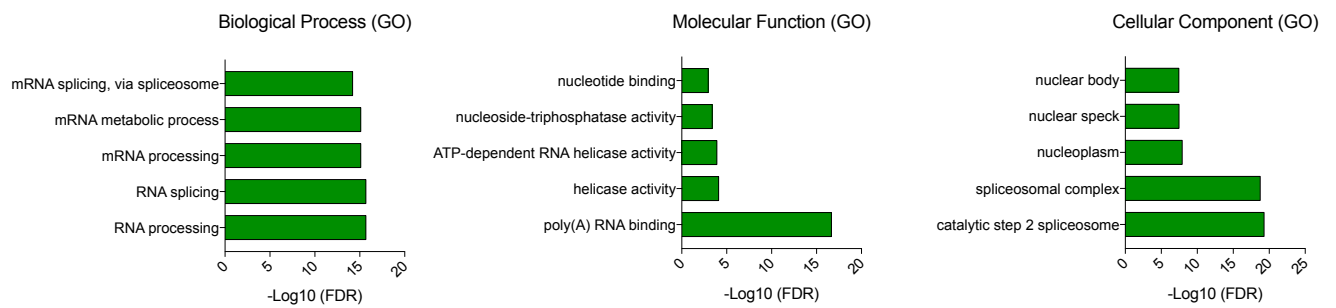

Supplemental Fig. 3

A

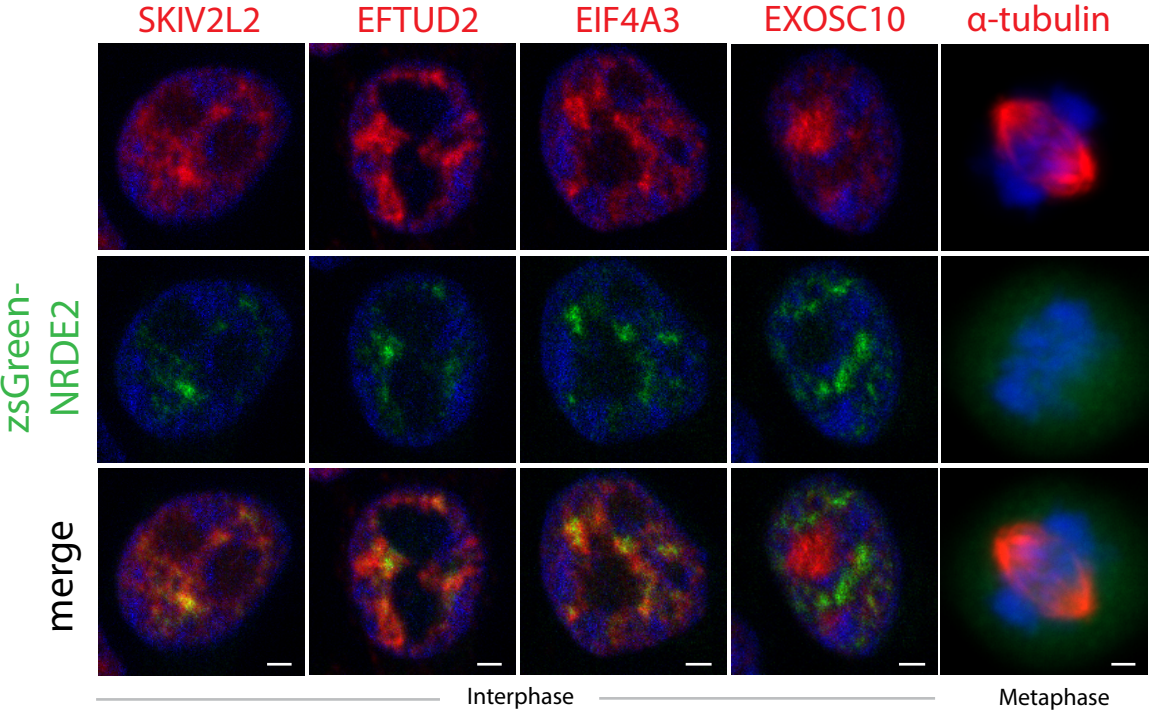

B

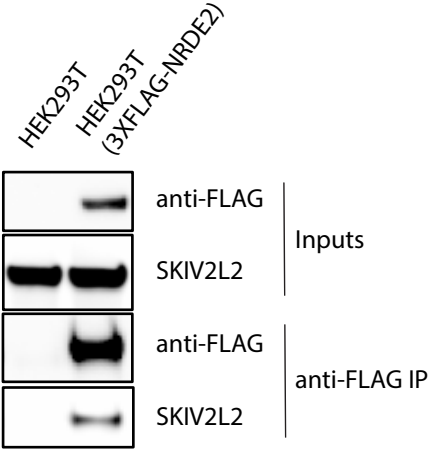

Supplemental Fig. 4

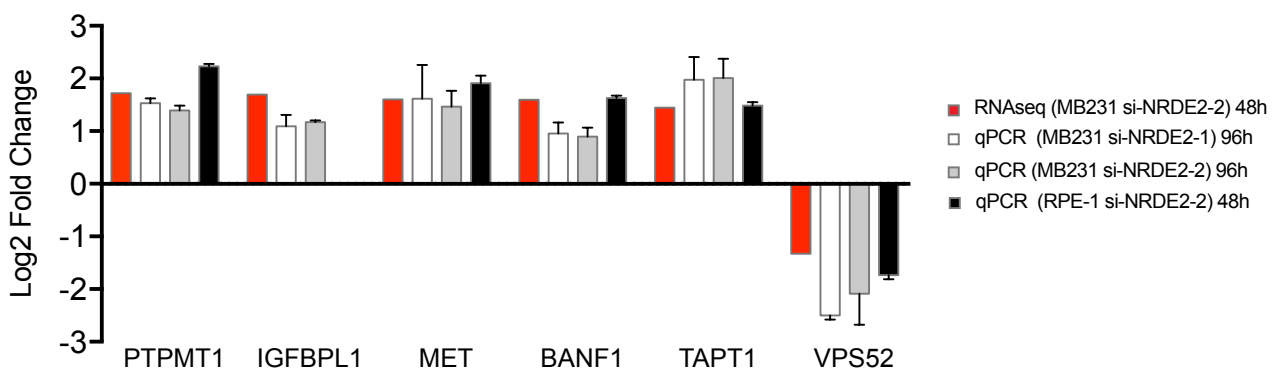

Supplemental Fig. 5

A

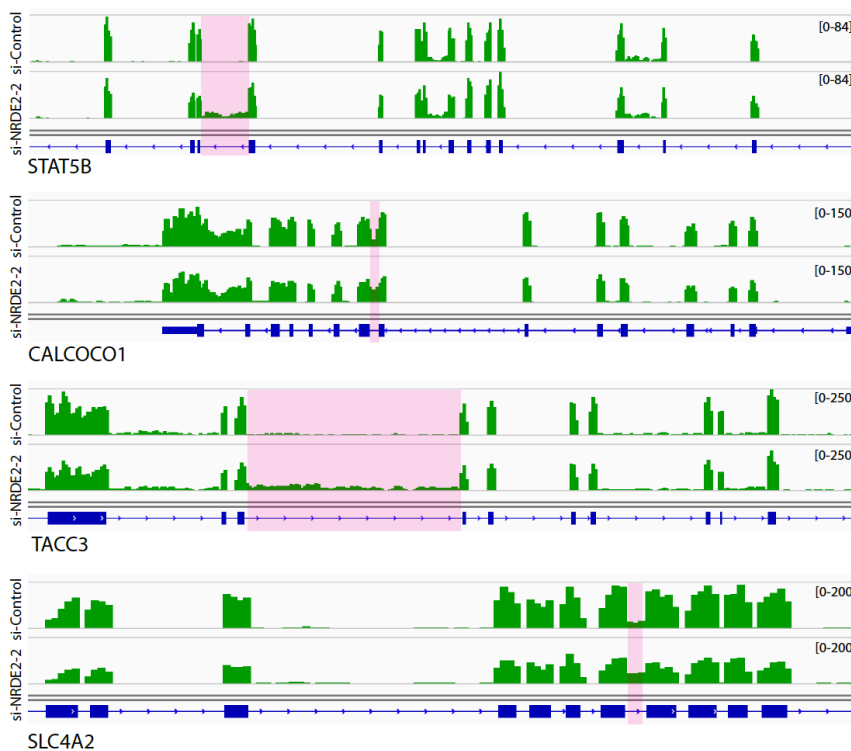

B

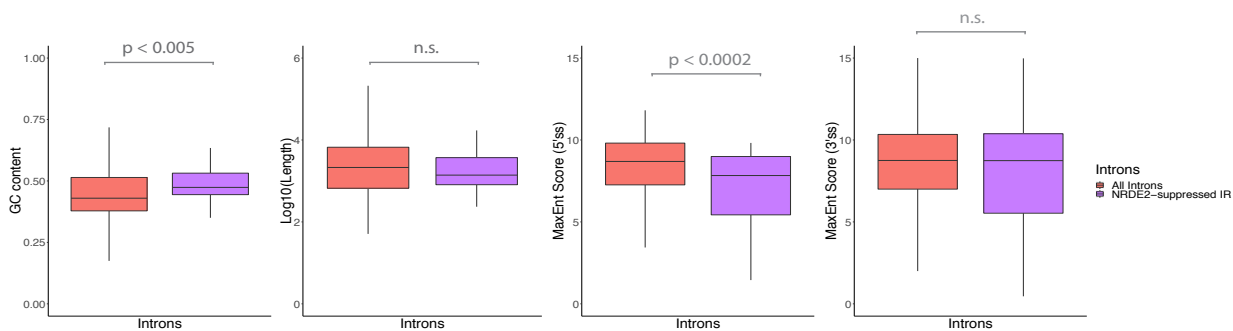

C

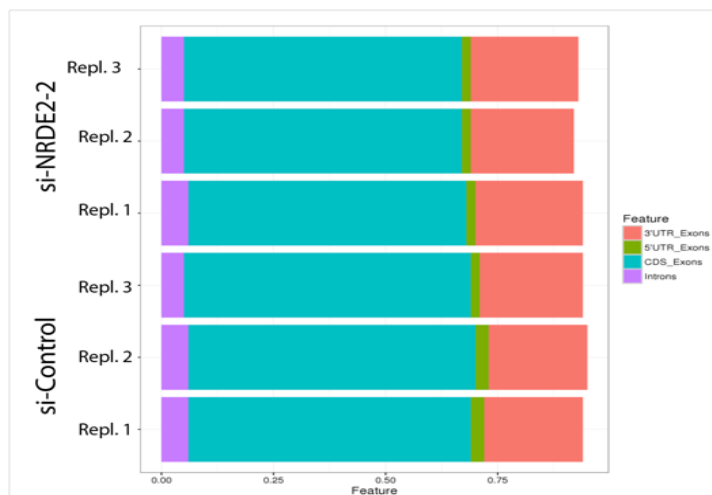

# Supplemental Fig. 6

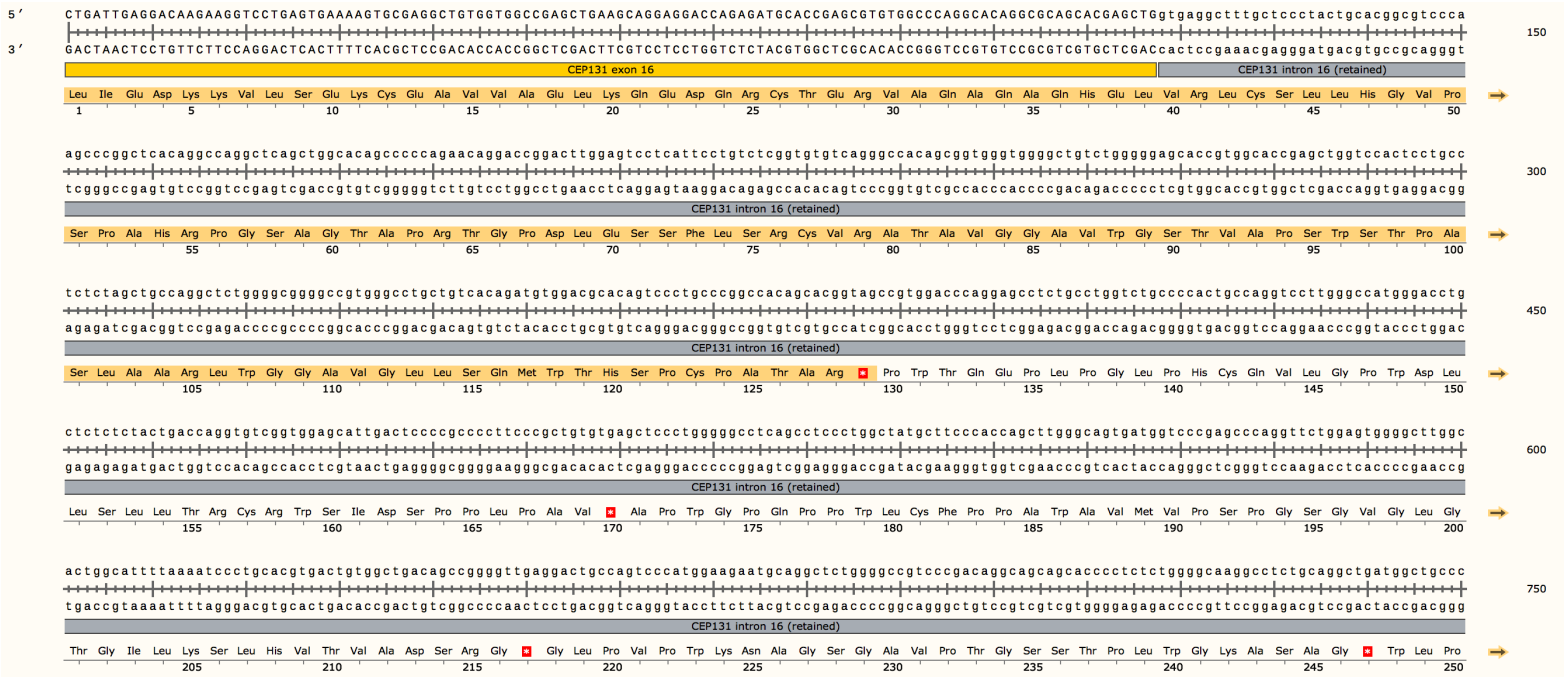

Supplemental Fig. 7

A

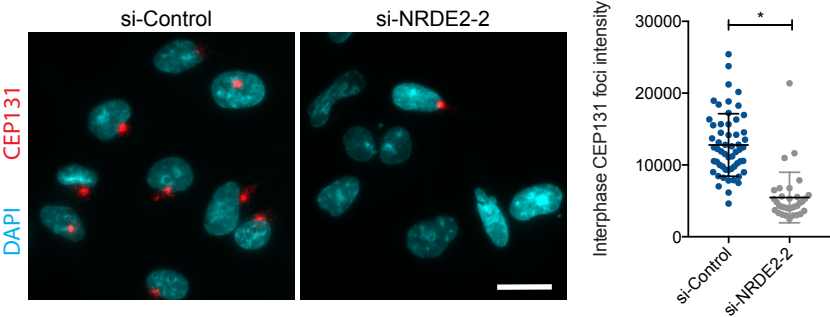

B

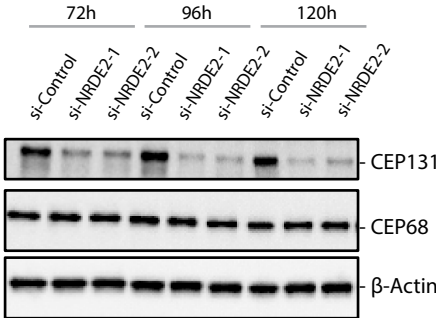

C

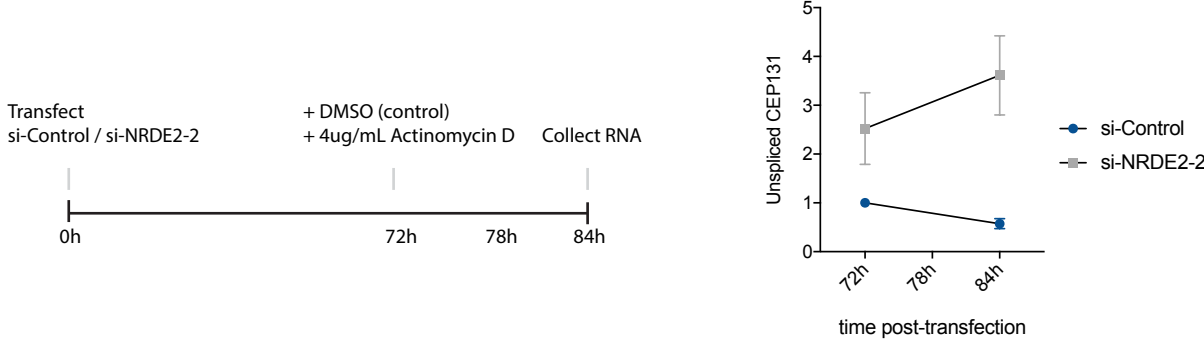

D

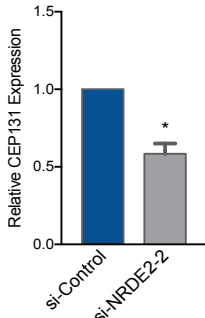

Supplemental Fig. 8

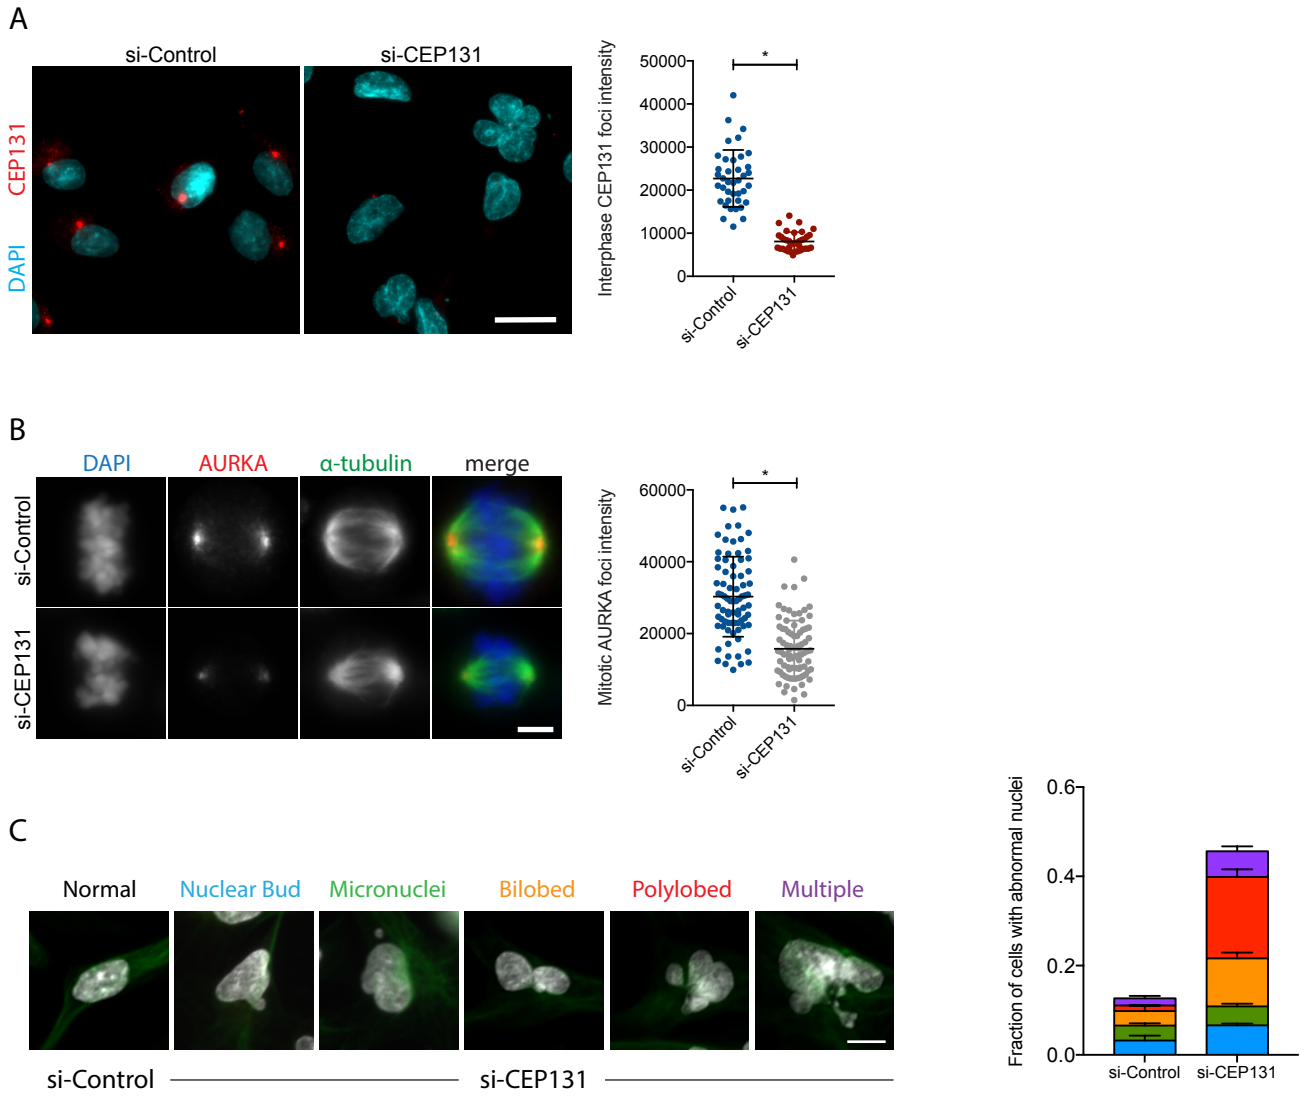



Supplemental Fig. 9

A

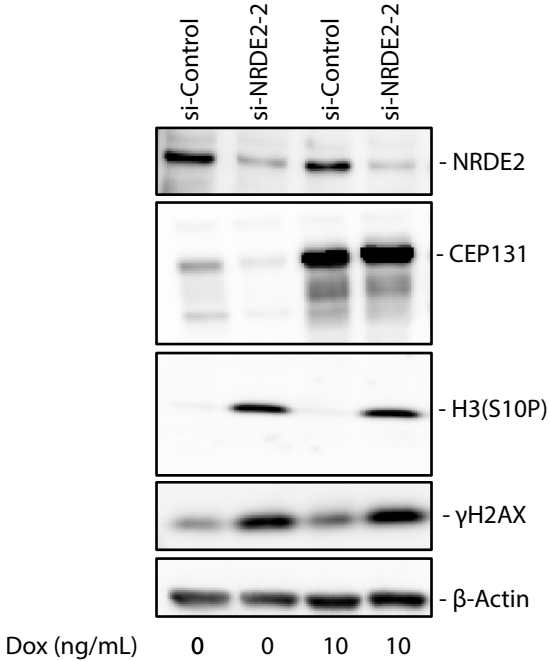

B

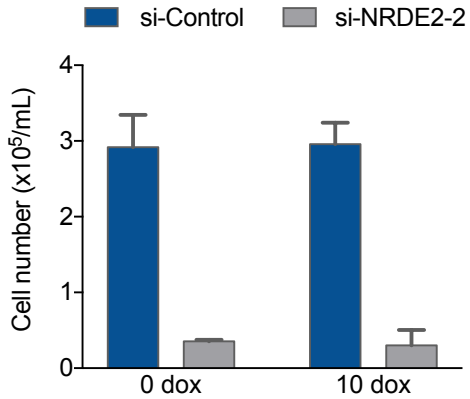

Supplemental Fig. 10

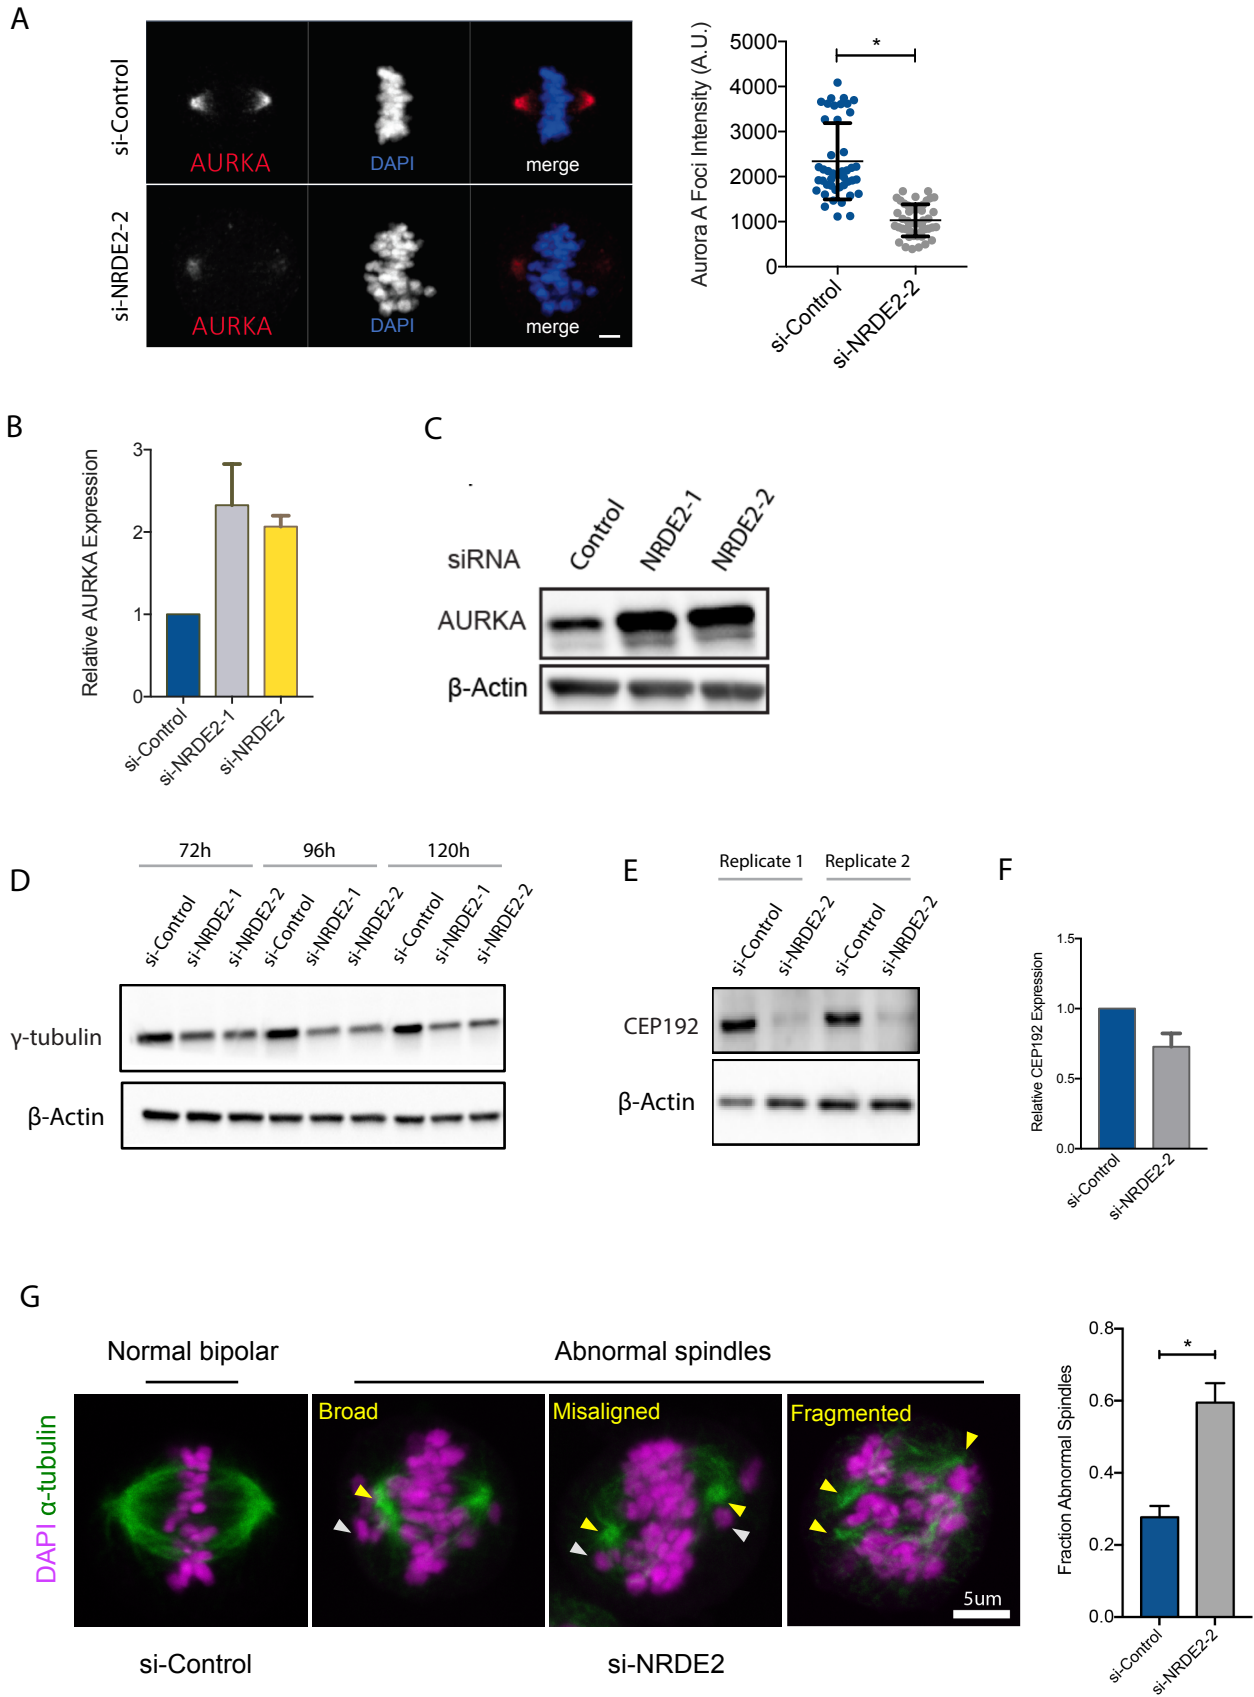

Supplemental Fig. 11

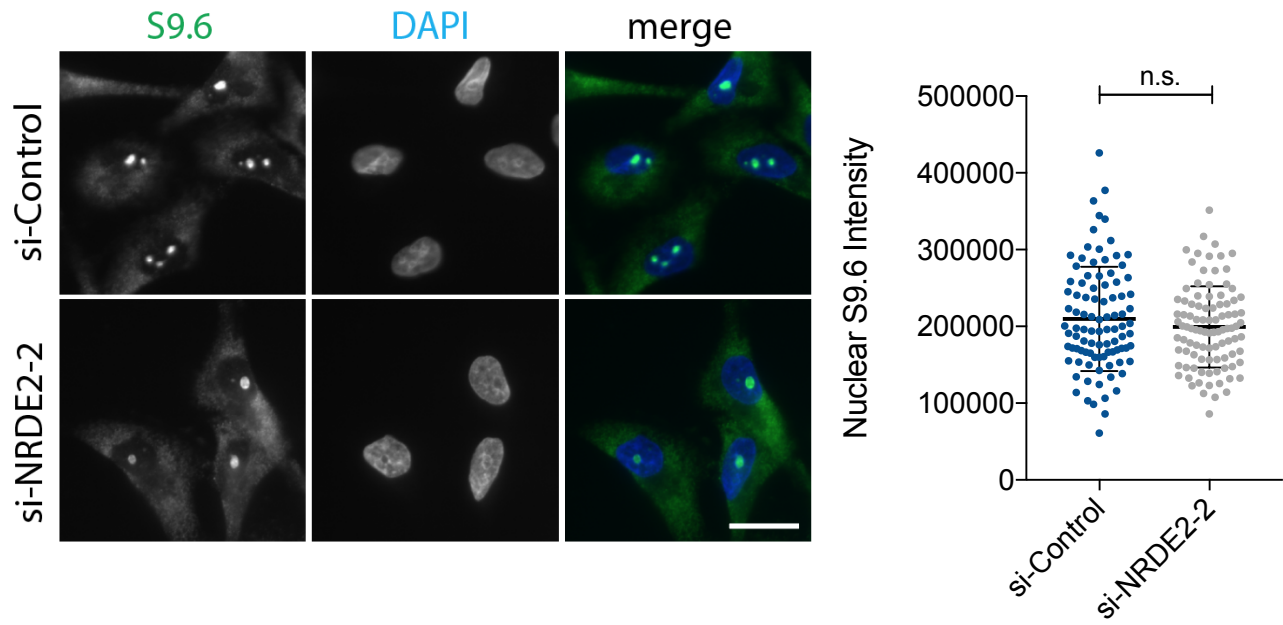

Supplemental Fig. 12

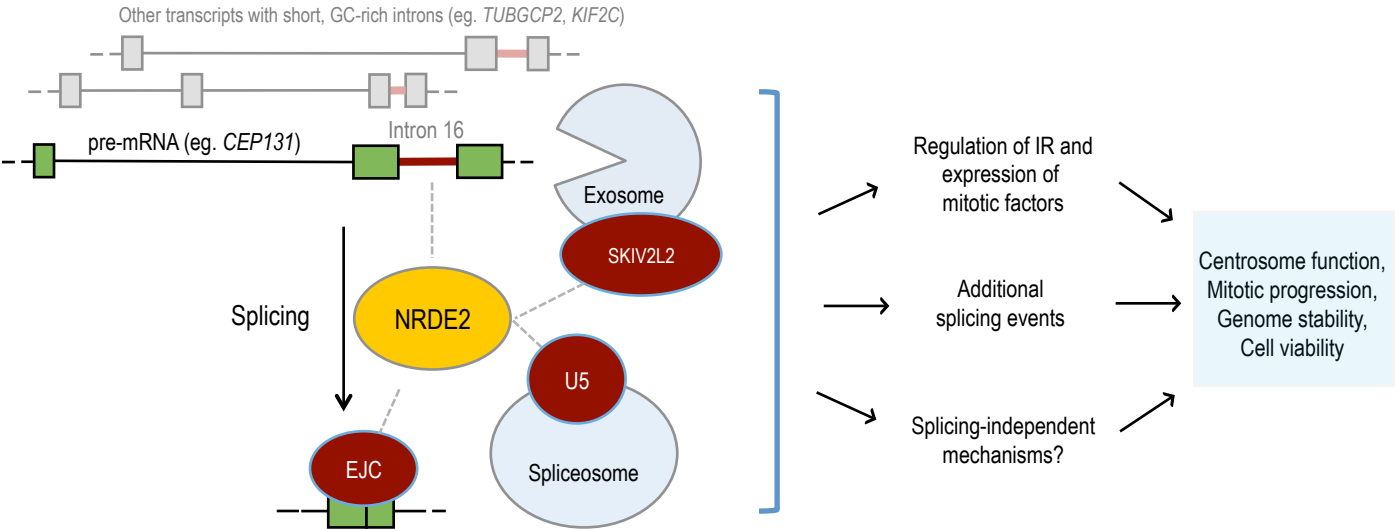

Supplement: supp_069773.118_Supplemental_Figures.pdf [file supp_069773.118_Supplemental_Figures.pdf]
